# Supplementary material for: Mitochondria-Responsive Drug Release along with Heat Shock Mediated by Multifunctional Glycolipid Micelles for Precise Cancer Chemo-Phototherapy
Source: PubMed Central journal article supplement — Theranostics. 2019 Jan 24;9(3):691–707. doi: 10.7150/thno.31022 (PMC6376467; doi:10.7150/thno.31022), 2019-01-24
Supplement: thnov09p0691s1.pdf [file thnov09p0691s1.pdf]

## Supplementary Information

### Mitochondria-responsive drug release along with heat shock mediated by multifunctional glycolipid micelles for precise cancer chemo-phototherapy

Yanan Tan,<sup>2</sup> Yun Zhu,<sup>2</sup> Lijuan Wen,<sup>1</sup> Xiqin Yang,<sup>1</sup> Xuan Liu,<sup>1</sup> Tingting Meng,<sup>1</sup> Suhuan Dai,<sup>1</sup> Yuan Ping,<sup>1</sup> Hong Yuan,<sup>1</sup> and Fuqiang Hu<sup>\*,1,2</sup>

1. College of Pharmaceutical Science, Zhejiang University, 866 Yuhangtang Road, Hangzhou 310058, China

2. Ocean College, Zhejiang University, 1 Zheda Road, Zhoushan 316021, China

\* Corresponding Author: Prof. Fuqiang Hu

Tel/Fax: +86-571-88208439

E-mail: hufq@zju.edu.cn

The photothermal conversion efficiency ( $\eta$ ) of IR780-CSOSA was calculated using the following equations (1–4):

$$\eta = \frac{hS(T_{max}-T_{surr})-Q_{dis}}{I(1-10^{-A_{808}})} \quad (1)$$

$$hS = \frac{\sum m_i C_i}{\tau_s} \quad (2)$$

$$\tau_s = -\frac{t}{\ln(\theta)} \quad (3)$$

$$\theta = \frac{T-T_{surr}}{T_{max}-T_{surr}} \quad (4)$$

In equation 1,  $h$  and  $S$  are the heat transfer coefficient and surface area of the container, respectively.  $T_{max}$  and  $T_{surr}$  are the final and initial temperature of the solution, respectively.  $Q_{dis}$  represents the heat dissipation of solvent;  $I$  is the laser power ( $I = 1.0$  W), and  $A_{808}$  is the sample absorbance at 808 nm. The  $A_{808}$  value for IR780-CSOSA was 2.663. In equation 2,  $m$  and  $C$  are the mass (0.5 g) and heat capacity ( $4.2 \text{ J g}^{-1} \text{ }^\circ\text{C}^{-1}$ ) of water, respectively. In equation 3,  $\tau_s$  is the time constant which was calculated by the linear fitting of  $t$  versus  $-\ln(\theta)$ , wherein,  $t$  is the time after irradiation in second (s). In equation 4,  $\theta$  is the dimensionless driving force, and  $T$  is the solution temperature. According to the experimental data, the ( $T_{max} - T_{surr}$ ) for IR780-CSOSA was  $24.7 \text{ }^\circ\text{C}$ ;  $\tau_{\text{IR780-CSOSA}}$  was calculated to be 151 s. (Figure S2) Therefore, the  $hS$  of IR780-CSOSA was  $13.9 \text{ mW}/^\circ\text{C}$ . The  $Q_{dis}$  of IR780-CSOSA was measured to be  $9.5 \text{ mW}$ . Substituting these parameters into the above equations, the  $\eta$  value of IR780-CSOSA was calculated to be 33.5%.

## Supplementary tables and figures

**Table S1.** Sizes and zeta potentials of different materials

| Material    | Size (nm) | PI        | Zeta potential (mV) |
|-------------|-----------|-----------|---------------------|
| CSOSA       | 85.0±3.8  | 0.40±0.01 | 37.4±1.5            |
| IR780-CSOSA | 149.7±2.5 | 0.18±0.02 | 39.4±0.6            |

Data represent the mean ± standard deviation (n = 3). PI: polydispersity index.

**Table S2.** Characteristics of DOX-loaded micelles

| Material        | Size (nm) | PI        | Zeta potential (mV) | EE (%) | DL (%) |
|-----------------|-----------|-----------|---------------------|--------|--------|
| CSOSA/DOX       | 48.4±1.1  | 0.39±0.05 | 36.1±0.7            | 87.0%  | 11.5%  |
| IR780-CSOSA/DOX | 119.0±7.6 | 0.08±0.03 | 37.8±0.9            | 81.1%  | 10.9%  |

Data represent the mean ± standard deviation (n = 3). PI: polydispersity index.

**Table S3.** DOX solubility in different temperature at pH 6.8 (n=3)

| DOX                  | 37 °C     | 43 °C      | 56 °C      |
|----------------------|-----------|------------|------------|
| Solubility ( μg/mL ) | 7.10±0.18 | 11.06±0.19 | 19.50±0.18 |

Data represent the mean ± standard deviation (n = 3).

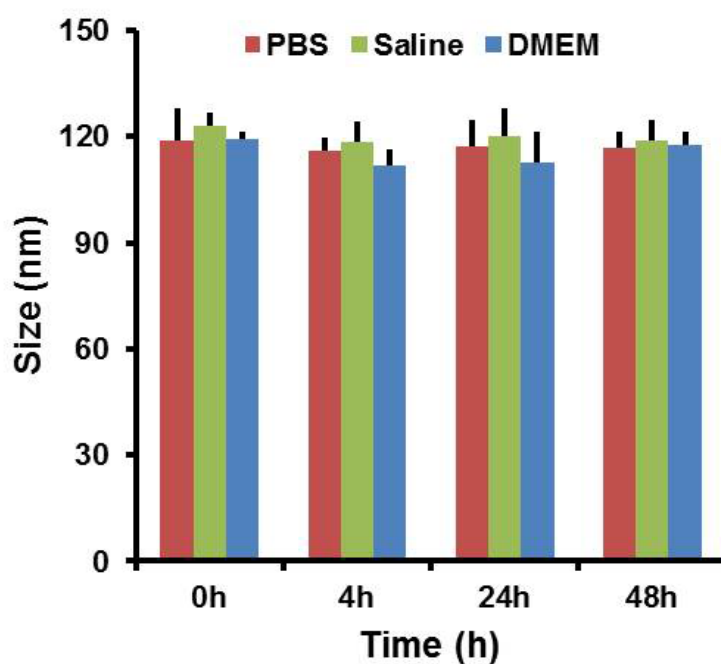

**Figure S1.** The size changes of IR780-CSOSA/DOX micelles during 48 h incubation within PBS, saline and DMEM.

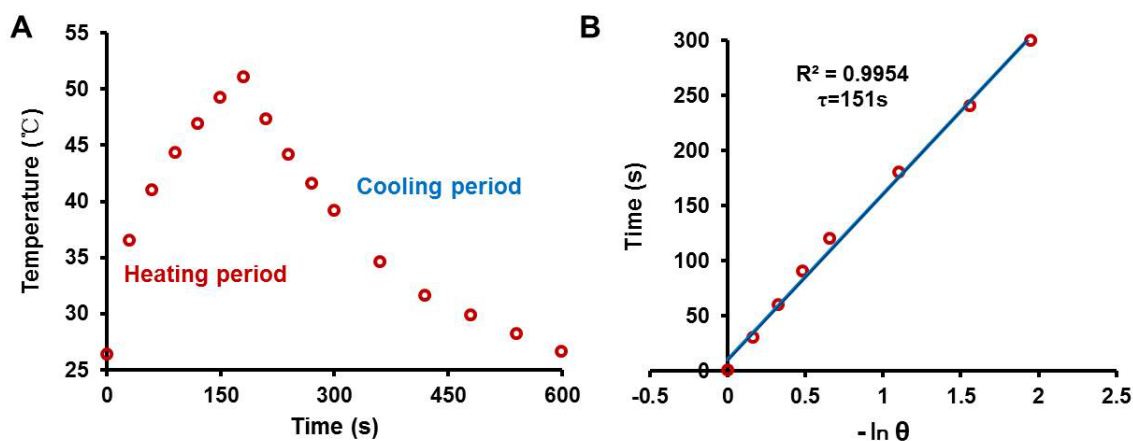

**Figure S2.** (A) Photothermal curve of IR780-CSOSA when illuminated with an 808 nm laser ( $1 \text{ W/cm}^2$ ) for 180s and then cooled naturally. (B) Plot of cooling time vs negative natural logarithm of the temperature driving force obtained from the cooling stage.

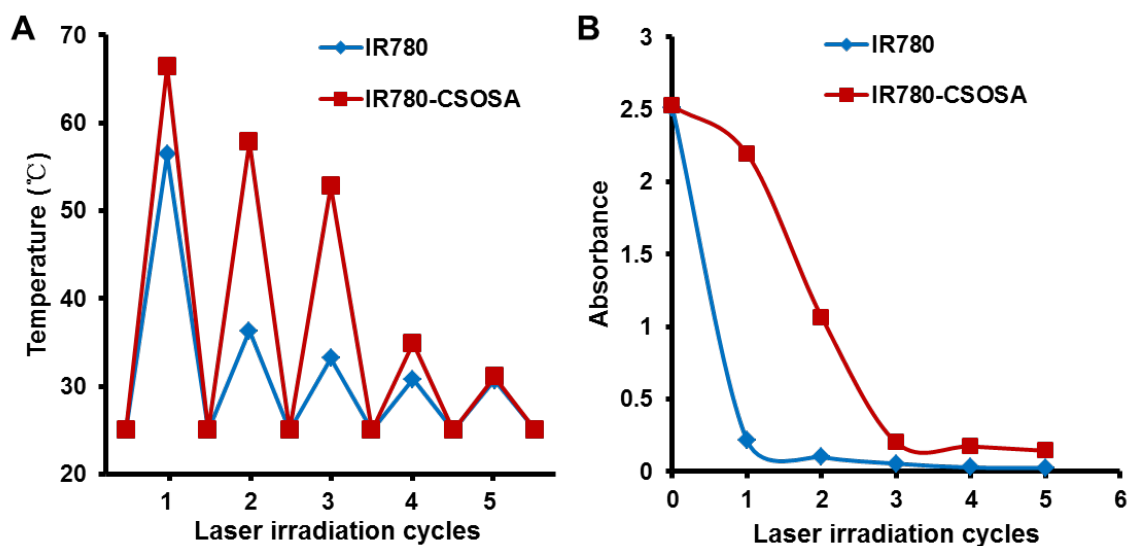

**Figure S3.** The photothermal curves and UV-vis absorbance curves of free IR780 and IR780-CSOSA micelles during five cycles of irradiations.

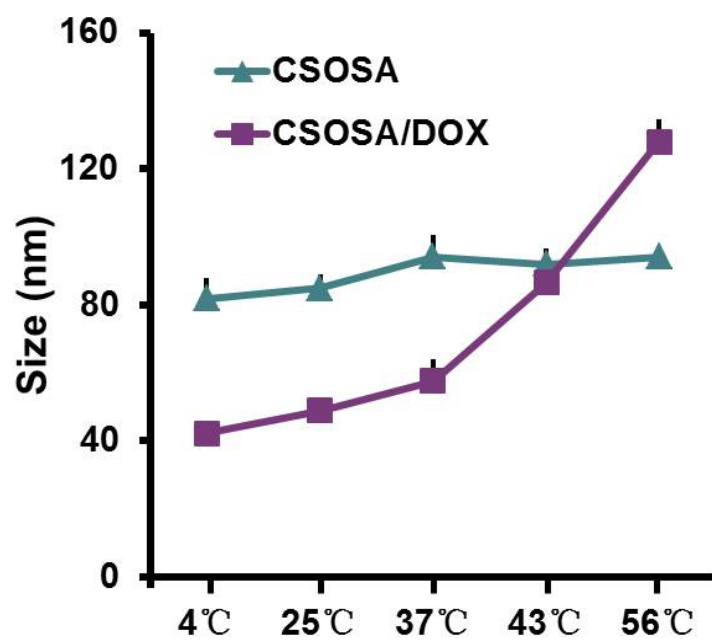

**Figure S4.** Size changes of CSOSA and CSOSA/DOX micelles at different temperatures (4 °C, 25 °C, 37 °C, 43 °C, 56 °C) by Zetasizer.

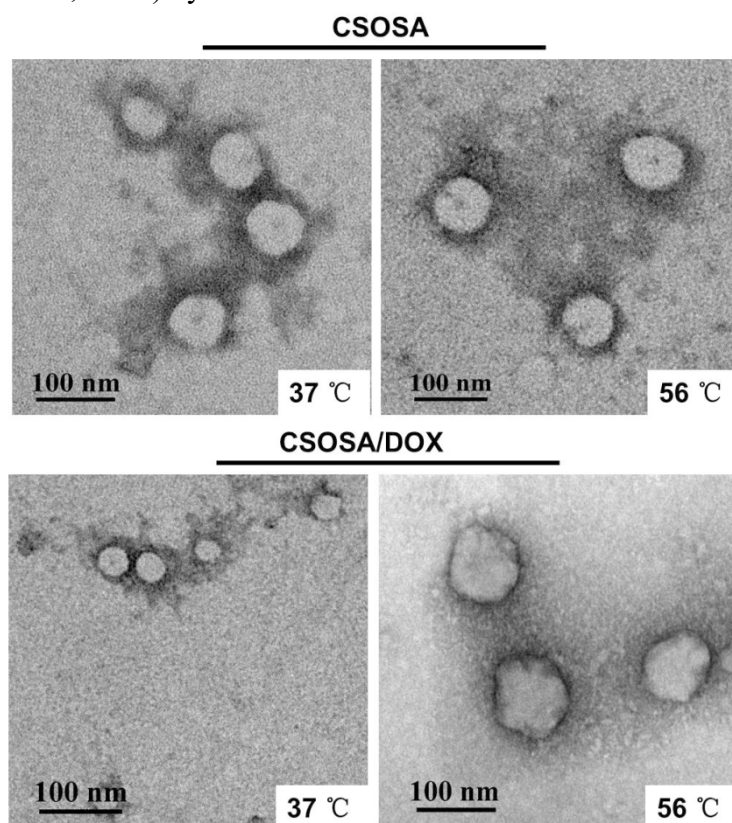

**Figure S5.** TEM images of CSOSA and CSOSA/DOX micelles at 37 °C and 56 °C.

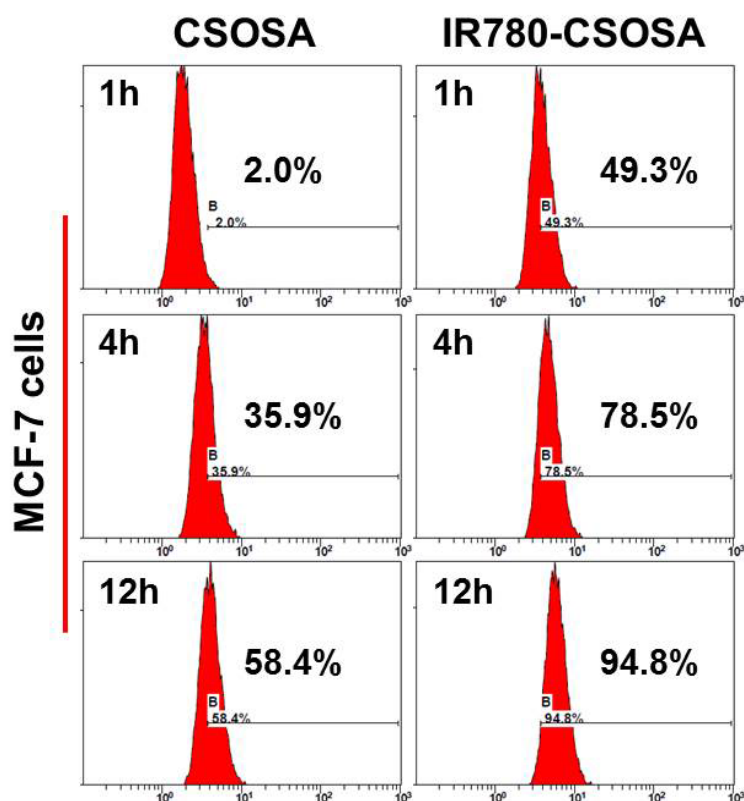

**Figure S6.** MCF-7 cells were incubated with FITC-labeled CSOSA or IR780-CSOSA micelles for 1, 4, and 12 h, respectively. Quantitative uptake assays were determined by flow cytometry.

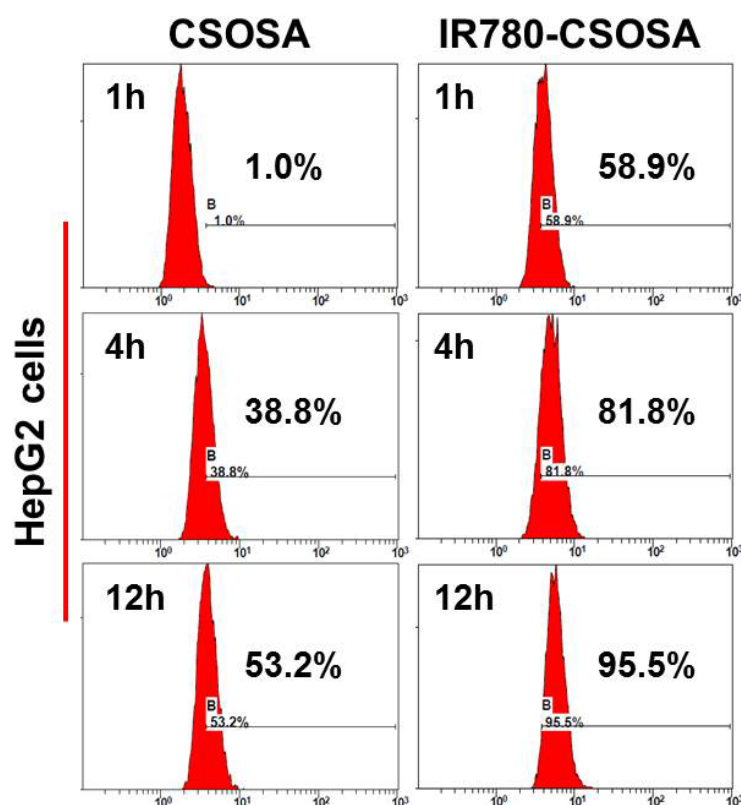

**Figure S7.** HepG2 cells were incubated with FITC-labeled CSOSA or IR780-CSOSA micelles for 1, 4, and 12 h, respectively. Quantitative uptake assays were determined by flow cytometry.

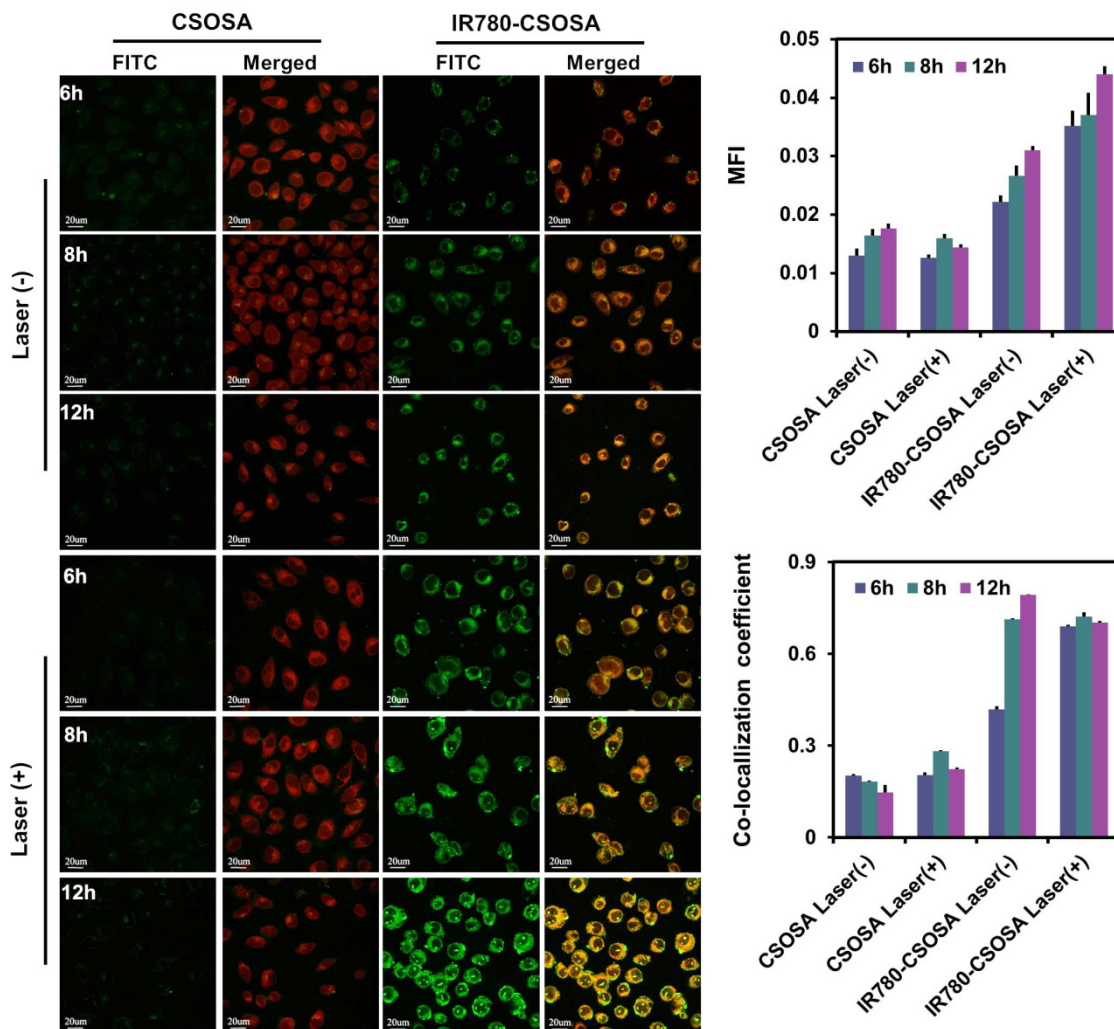

**Figure S8.** NIR-triggered internalization of micelles inside mitochondria *in vitro*. MCF-7 cells were treated with the FITC-CSOSA or FITC-IR780-CSOSA for 4 h. Then, the cells were irradiated with or without laser (808 nm, 1 W/cm<sup>2</sup>) for 3 min and continuously incubated for 2, 4 h and 8 h to observe the cellular uptake and mitochondrial co-localization of micelles by CLSM. Green: FITC-labeled micelles. Red: Mitotracker red. Yellow spots in the merged pictures denoted the co-localization of the micelles within mitochondrial compartments. The mean fluorescence intensity (MFI) analysis of micelles. The co-localization coefficient of micelles and mitochondria.

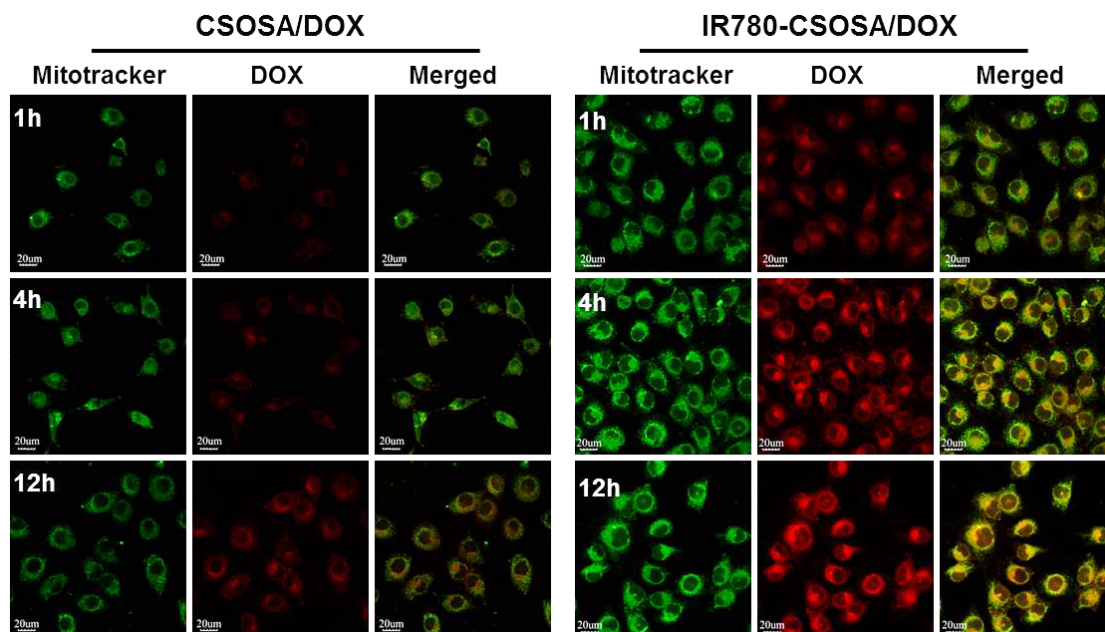

**Figure S9.** *In vitro* cellular uptake and mitochondrial co-localization of CSOSA/DOX or IR780-CSOSA/DOX micelles on MCF-7 cells for 1, 4, and 12 h, respectively. Green: Mitotracker green. Red: DOX. Yellow spots in the merged pictures denoted the co-localization of DOX-loaded micelles within mitochondrial compartments.

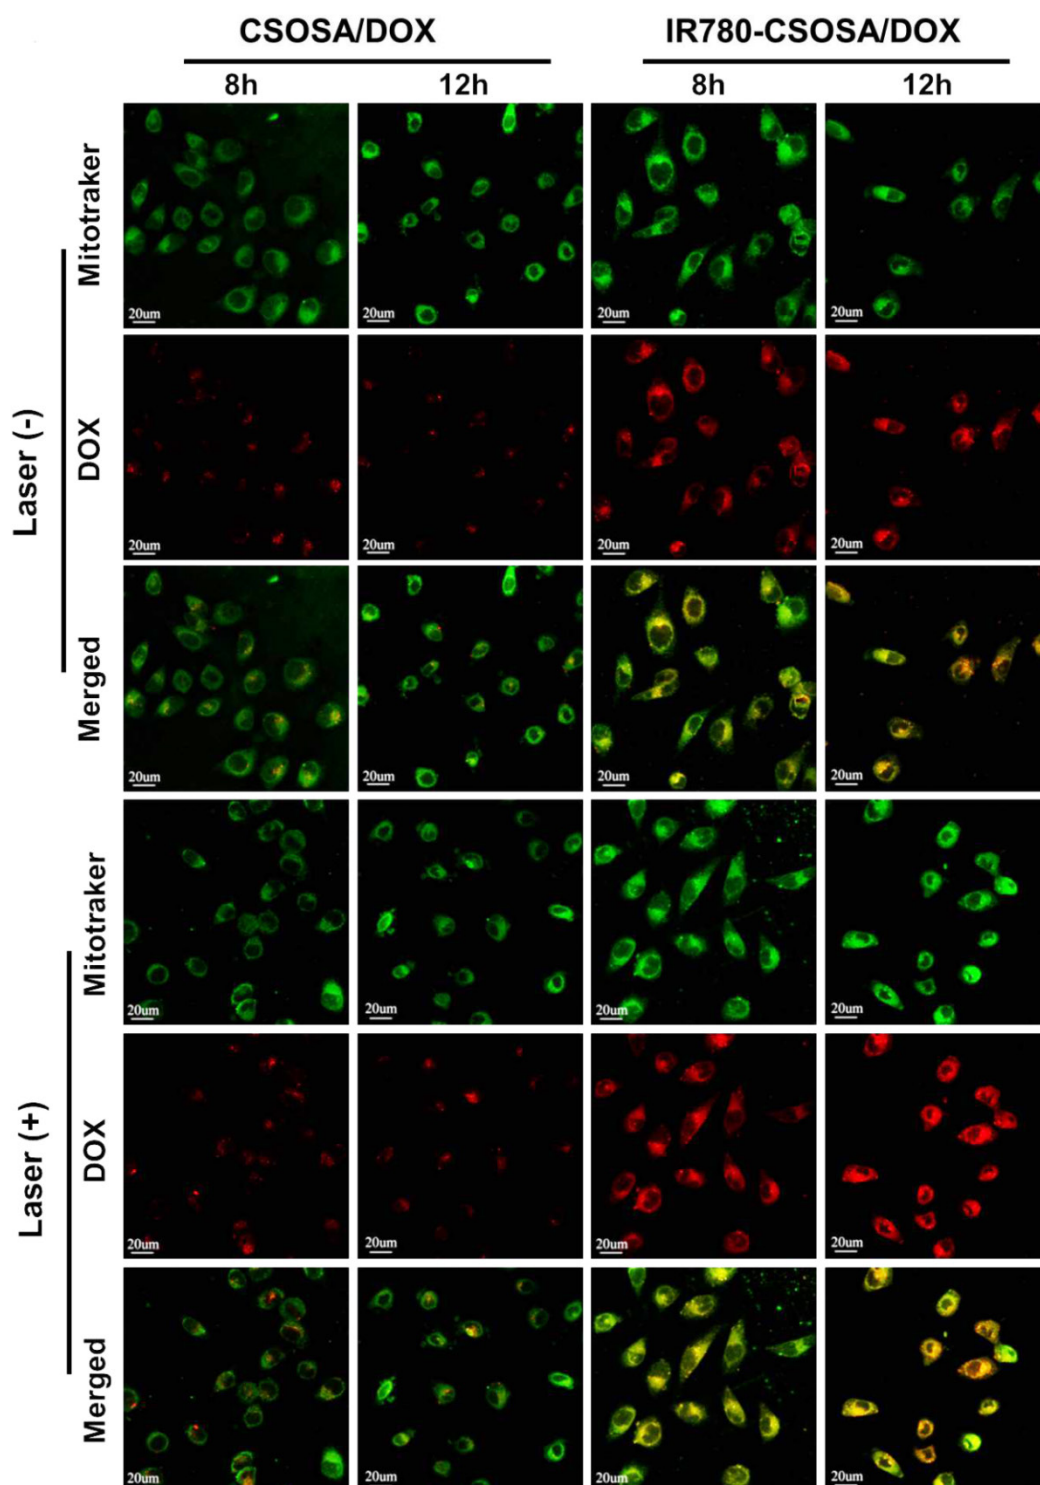

**Figure S10.** NIR-triggered drug release inside mitochondria in MCF-7 cells. MCF-7 cells were treated with CSOSA/DOX or IR780-CSOSA/DOX (equivalent DOX: 1.5  $\mu\text{g}/\text{mL}$ ) for 4 h. Next, the culture medium were replaced with fresh medium to remove the uninternalized nanoparticles and irradiated with or without laser (808 nm, 1 W/cm<sup>2</sup>) for 3 min, then continuously incubated for 4 h or 8 h to observe the NIR-triggered DOX release in mitochondria by CLSM. Green: Mitotracker green. Red: DOX. Yellow spots in the merged pictures denoted the co-localization of released DOX within mitochondrial compartments.



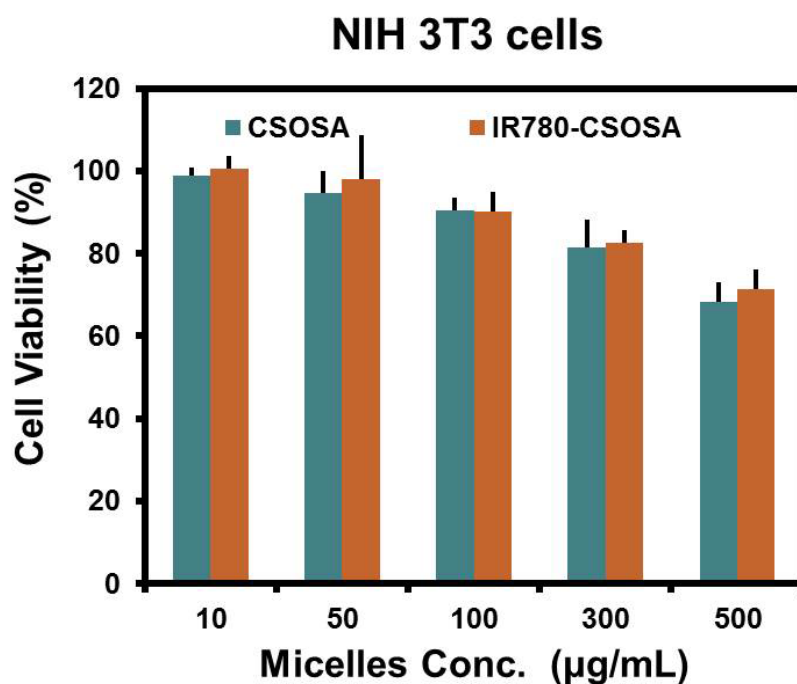

**Figure S11.** In vitro cytotoxicity of CSOSA and IR780-CSOSA against NIH 3T3 cells with different micelles concentrations for 48 h. (n = 3).

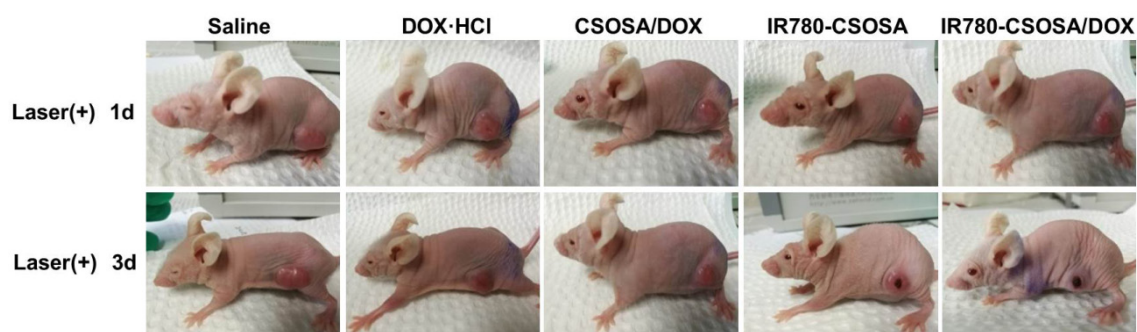

**Figure S12.** Representative images of MCF-7 tumor xenografted mice treated with different formulations (equivalent DOX: 2 mg/kg). After the day of injection, the tumors were exposed to the laser (808 nm, 0.5 W/cm<sup>2</sup>) for 3 min.

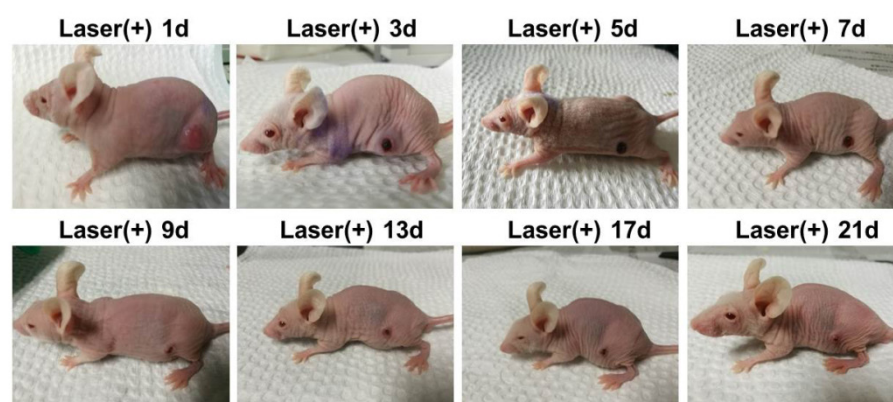

**Figure S13.** Representative images of MCF-7 tumor-xenografted mice treated with combined chemo-photothermal therapy IR780-CSOSA/DOX (equivalent DOX: 2mg/kg) under laser irradiation (808 nm, 0.5 W/cm<sup>2</sup>, 3 min) in 21 days.

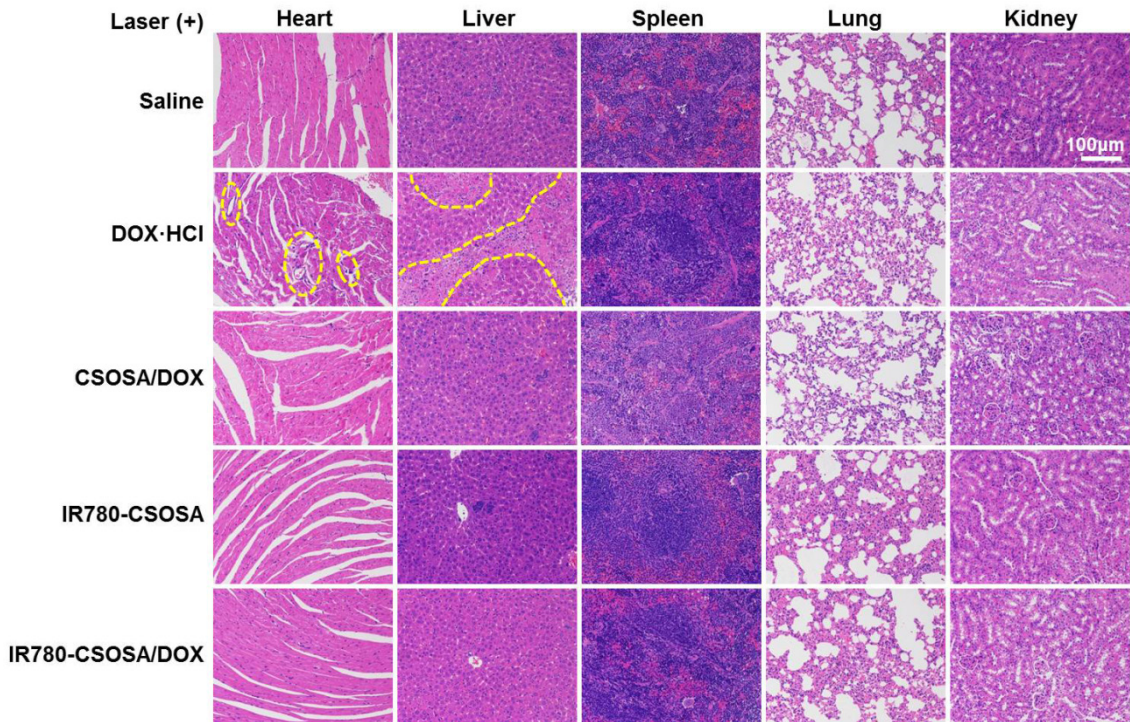

**Figure S14.** Representative HE staining of various organ tissues of MCF-7 tumor-xenografted mice in five treatment groups with laser irradiation (808 nm, 0.5 W/cm<sup>2</sup>, 3 min). Yellow lines denoted pathological changes area. Scale bar: 100 µm.

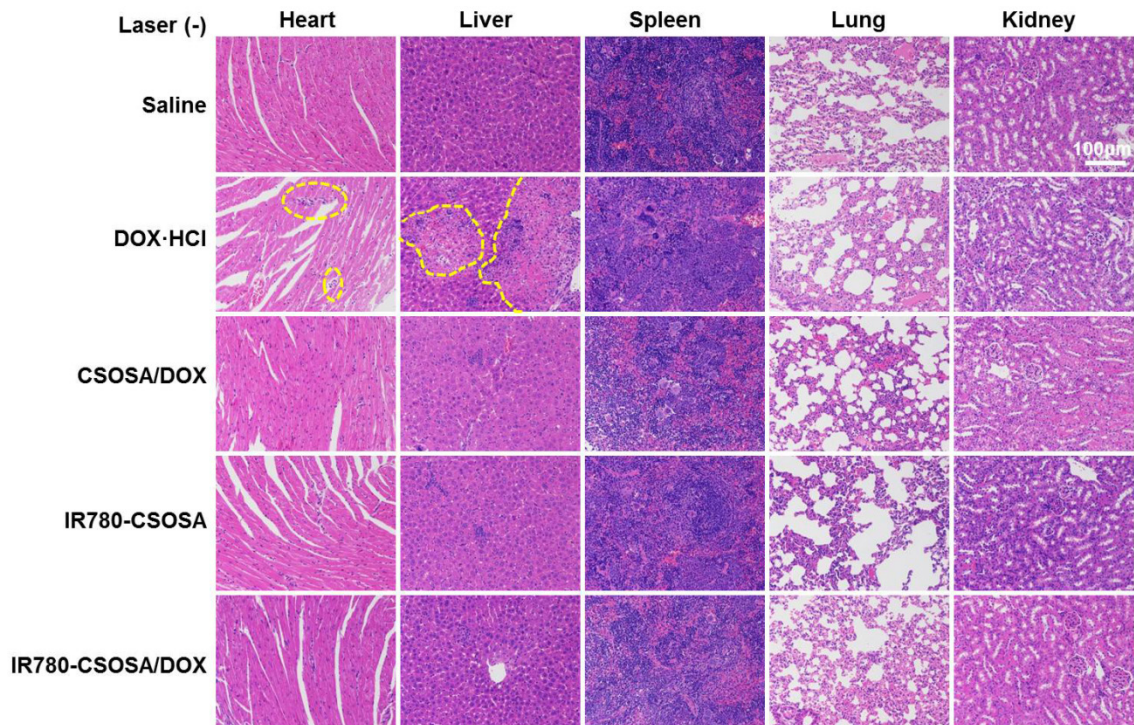

**Figure S15.** Representative HE staining of various organ tissues of MCF-7 tumor-xenografted mice in five treatment groups without laser irradiation. Yellow lines denoted pathological changes area. Scale bar: 100 µm.

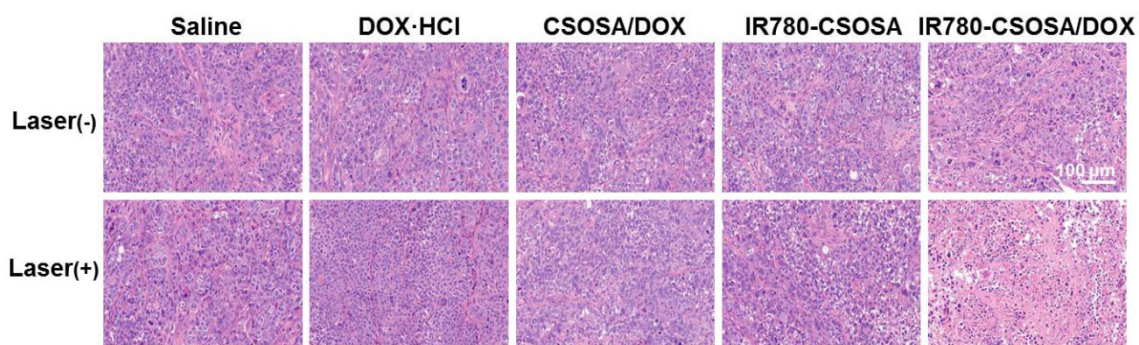

**Figure S16.** Representative HE images of tumor tissues in MCF-7 tumor-xenografted mice treated with different formulations with or without laser irradiation (808 nm, 0.5 W/cm<sup>2</sup>, 3 min). Scale bar: 100 μm.

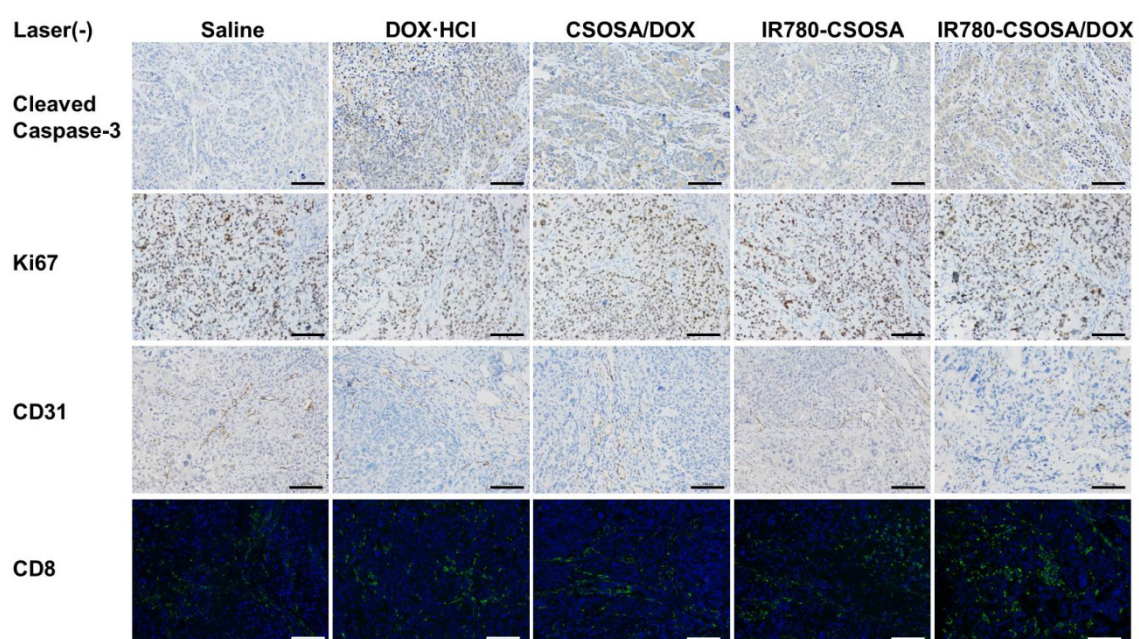

**Figure S17.** Under no laser irradiation, the induction of apoptosis on MCF-7 tumor tissues stained with cleaved caspase-3 antibody (brown). Cell proliferation evaluation by Ki67 staining (brown). Tumor blood vessel staining with CD 31 antibody (brown). CD 8<sup>+</sup> T cells in MCF-7 tumor tissues were detected by immunofluorescent staining (green). Scale bar: 100 μm.

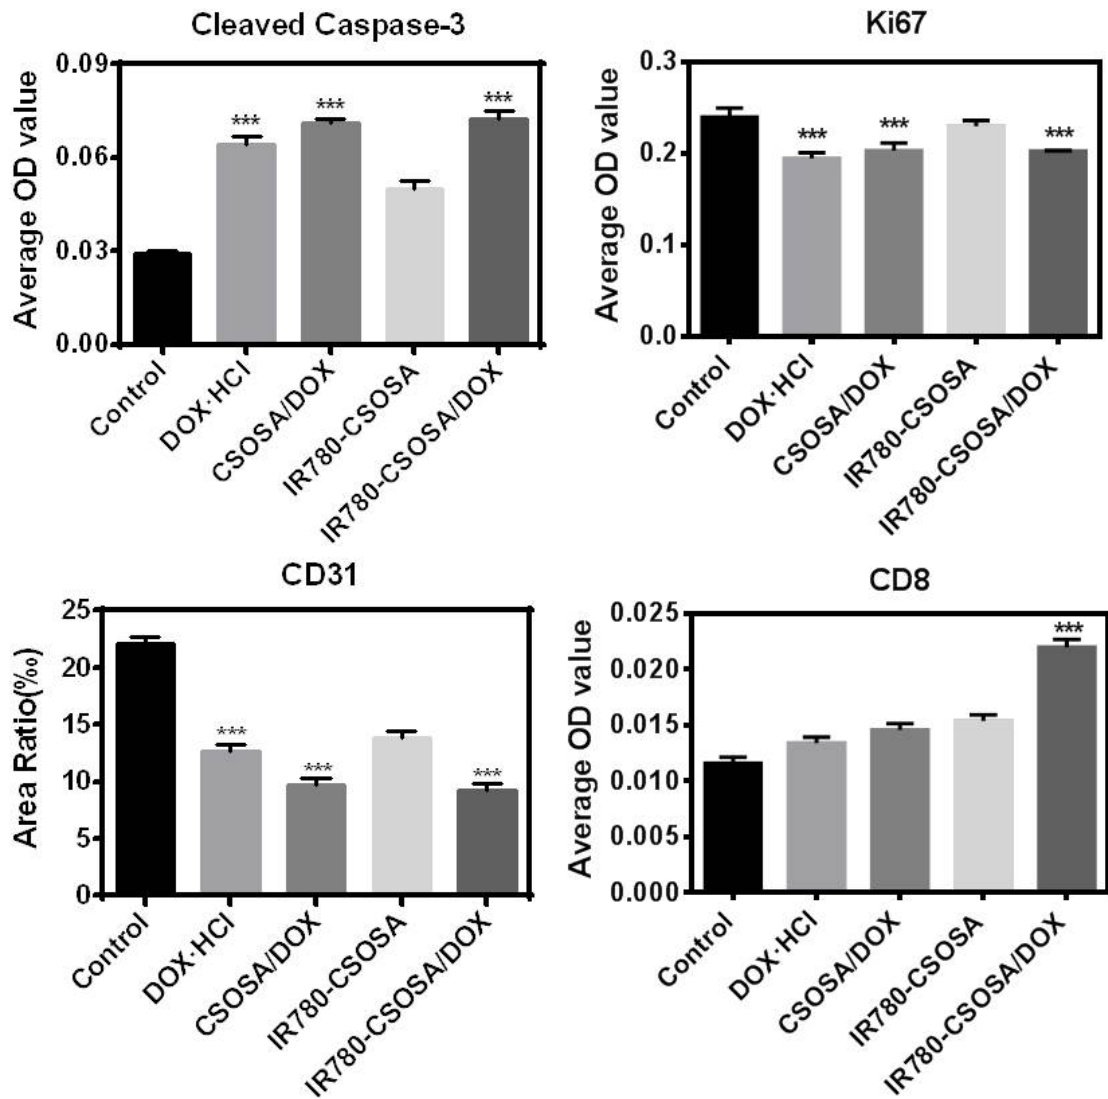

**Figure S18.** Under no laser irradiation, the quantitative analysis of cleaved caspase-3, Ki67, CD31 and CD8 levels in MCF-7 tumor-xenografted mice treated with different formulations. (n = 3), \*\*\*P < 0.001.
